# Supplementary material
Source: Elsevier journal article supplement (https://rcastoragev2.blob.core.windows.net/2c2c3886e862094b62f6badcbd7b388b/mmc1.pdf)
Supplement: mmc1 [file mmc1.pdf]

# THE LANCET

## Infectious Diseases

### **Supplementary appendix**

This appendix formed part of the original submission and has been peer reviewed. We post it as supplied by the authors.

Supplement to: Kokaliaris C, Garba A, Matuska M, et al. Effect of preventive chemotherapy with praziquantel on schistosomiasis among school-aged children in sub-Saharan Africa: a spatiotemporal modelling study. *Lancet Infect Dis* 2021; published online Dec 2. [https://doi.org/10.1016/S1473-3099\(21\)00090-6](https://doi.org/10.1016/S1473-3099(21)00090-6).

## Appendix

### Search strategy, selection criteria and data extraction protocol

We did a systematic review following the PRISMA guidelines [10]. We searched for relevant publications pertaining to prevalence of *Schistosoma* spp infection in sub-Saharan Africa, in PubMed, ISI Web of Science, and African Journals Online, from January 1, 2000 to May 29, 2020. The application that supports the data compilation carries automated routines that flag duplicated entries according to survey year and locations within a district for each newly acquired reference.

We applied the search string “schisto\* (OR mansoni, OR bilhar\*, OR haema\*) AND sub-Saharan Africa (OR Angola, OR Benin, OR Botswana, OR Burkina Faso, OR Burundi, OR Cameroon, OR Central African Republic, OR Chad, OR Congo\*, OR Cote d’Ivoire, OR Cote d’Ivoire, OR Ivory Coast, OR Djibouti, OR Eritrea, OR Ethiopia, OR Gabon, OR Gambia, OR Ghana, OR Guinea\*, OR Kenya, OR Lesotho, OR Liberia, OR Madagascar, OR Malawi, OR Mali, OR Mauritania, OR Mozambique, OR Namibia, OR Niger, OR Nigeria, OR Rwanda, OR Senegal, OR Sierra Leone, OR Somalia, OR South Africa, OR Sudan, OR Swaziland, OR Tanzania, OR Togo, OR Tunisia, OR Uganda, OR Zambia, OR Zimbabwe)”. Government reports and other grey literature (eg, PhD theses, working papers from research groups, or unpublished research reports obtained through personal communication) were also considered.

We set no parameters for language or study design. We initially screened titles and abstracts to identify potentially relevant articles. We excluded case reports, invitro studies, non-human studies, or those that did not report on schistosomiasis. We additionally excluded studies without prevalence data, those done in specific groups of patients (eg, hospital patients, those infected with HIV) or clearly defined population groups (ie. travelers, military personnel, expatriates, nomads, and displaced or migrating populations, pregnant women, neonates) not representative of the general population, studies that used either indirect diagnostic techniques (because such tests distinguish between active and cleared infection) or direct stool smear (because of low diagnostic sensitivity), reports of case-control studies, clinical trials, pharmacological studies (except control groups without anthelmintic intervention), intervention studies (except for baseline data or control groups), studies that reported on species other than *S haematobium* and *S mansoni*, and surveys done before 2000, that were not community based or school based, or were done in places where population deworming had been done within 1 year, or study findings reported aggregated within regions (ie, administrative division of level one).

Full-text reports for potentially relevant papers were obtained and screened. We reviewed the reference lists of full-text articles for further possible data sources. Duplicates were removed. If important information was missing (eg, survey year, location names or coordinates, numbers of individuals assessed and positive, etc) or if surveys were aggregated, we contacted the authors for clarification. The survey locations were geographically referenced if this information was not provided in the data source or validated. The georeferencing was done using online maps and travel guide sources (e.g. Google maps, Wikimapia, iGuide Interactive Travel Guide, Humanitarian Data Exchange). We assigned centroids for administrative units on the basis of administrative boundaries in the Database of Global Administrative Areas (version 2).

Relevant survey data were extracted and entered in the GNTD database with information on the source (authors, journal, publication date), survey (date, type of survey), location (coordinates, name, administrative unit), and parasitology (species, number of people positive or examined, prevalence, age, diagnostic tool).

Quality control for each country was done by rechecking 30% of randomly selected papers deemed irrelevant. If any misclassifications were identified, the selection for the whole country was rechecked.

We included those surveys in the meta-analysis with sample size greater than ten individuals. If the date of the survey was missing, we used date of publication instead.

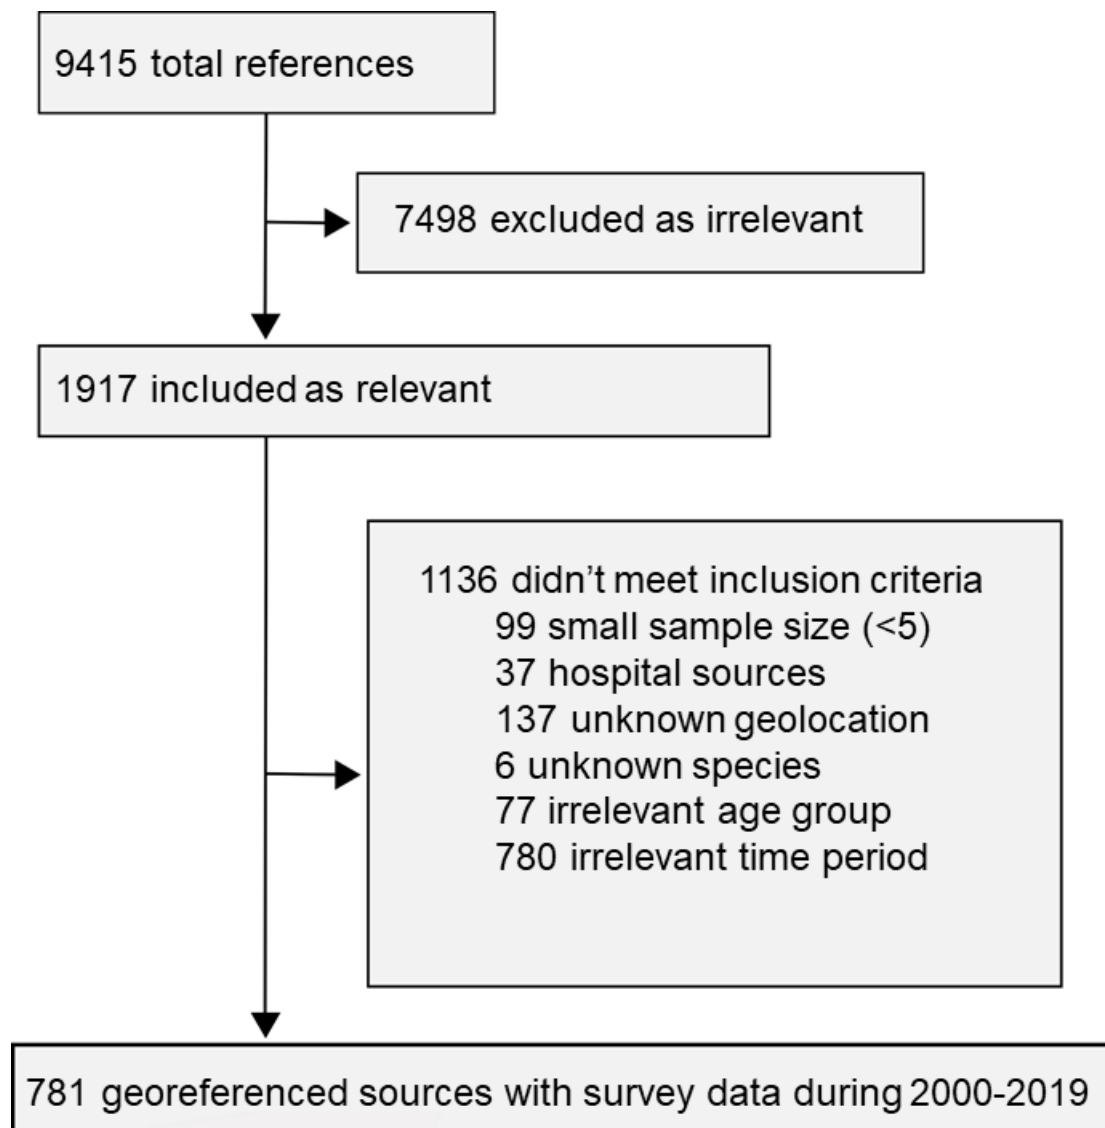

Figure A.1: Data search and selection criteria during 2000-2019.

## Data sources

Day and night land surface temperature (LSTD, LSTN) were used as proxies of ambient temperature. The normalized difference vegetation index (NDVI) was considered as a proxy for moisture. Decadal rainfall averages were obtained from the Climate Prediction Center rainfall estimates. In order to increase the predictive ability of the model, we also included 19 bioclimatic variables from the Worldclim database (<http://www.worldclim.org/bioclim>, accessed May 2020) into our analysis. Data on freshwater bodies were obtained from Copernicus Global Land Service (<https://land.copernicus.eu/global/products/wb>, accessed May 2020). The geographical distribution of socioeconomic and environmental predictors across SSA is displayed in Figure A.5 and A.6 respectively (pages 36, 47). Agro-ecological zones are presented in Figure A.7 (page 39) and were obtained from the International Food Policy Research Institute [32].

| Data type                                          | Data period | Temporal resolution | Spatial resolution | Source                                                                                                        |
|----------------------------------------------------|-------------|---------------------|--------------------|---------------------------------------------------------------------------------------------------------------|
| Bioclimatic variables                              | 1970-2000   | Monthly             | 1 km               | Worldclim - Global climate data version 2                                                                     |
| Land surface temperature day and night             | 2000-2019   | 8 days              | 1 km               | Moderate resolution imaging spectroradiometer (MODIS)/ Terra                                                  |
| Normalized difference vegetation index             | 2000-2019   | 16 days             | 1 km               | MODIS/Terra                                                                                                   |
| Land cover                                         | 2000-2019   | Yearly              | 1 km               | MODIS/Terra                                                                                                   |
| Rainfall                                           | -           | Daily               | 15 km              | Climate Prediction Center (CPC) Rainfall Estimator (RFE)                                                      |
| Altitude                                           | -           | -                   | 90 m               | Shuttle Radar Topography Mission (SRTM)                                                                       |
| Rural - Urban                                      | 2000        | -                   | 1 km               | Socioeconomic Data and Applications Center (SEDAC)                                                            |
| Population counts per pixel                        | 2010-2020   | -                   | 100 m              | WorldPop                                                                                                      |
| Improved water source                              | 2000-2017   | -                   | Household surveys  | Demographic and Health Surveys (DHS), Multiple Indicator Cluster Surveys - UNICEF, World Health Surveys - WHO |
| Improved sanitation                                | -           | -                   |                    |                                                                                                               |
| Infant mortality rate                              | -           | -                   |                    |                                                                                                               |
| Gridded surface of freshwater bodies               | 2019        | -                   | 300 m              | Copernicus Global Land Service                                                                                |
| Gridded surface of agro-ecological zones in Africa | 2011        | -                   | 5 km               | HarvestChoice/IFPRI 2009                                                                                      |

Table A.1: Data sources and properties on socioeconomic and environmental explanatory variables.

| Country           | Locations |        |           |           |           |           | Positive diagnose (%) |           |           |
|-------------------|-----------|--------|-----------|-----------|-----------|-----------|-----------------------|-----------|-----------|
|                   | Total     | School | Community | 2000-2010 | 2011-2014 | 2015-2019 | 2000-2010             | 2011-2014 | 2015-2019 |
| Angola            | 431       | 41     | 390       | 41        | 182       | 206       | 76.6                  | 17.9      | 7.5       |
| Benin             | 384       | 1      | 383       | 6         | 184       | 194       | 43.4                  | 20.9      | 15.4      |
| Botswana          | 45        | 0      | 45        | 0         | 0         | 45        |                       |           | 4.2       |
| Burkina Faso      | 205       | 1      | 204       | 123       | 24        | 95        | 17.6                  | 7.9       | 1.8       |
| Burundi           | 22        | 0      | 22        | 22        | 0         | 0         |                       |           |           |
| Cameroon          | 937       | 2      | 935       | 264       | 343       | 333       | 14.8                  | 11.6      | 4.1       |
| Central Africa    | 2         | 0      | 2         | 0         | 0         | 2         |                       |           | 54        |
| Chad              | 265       | 0      | 265       | 19        | 0         | 246       | 21.6                  |           | 23.8      |
| Ivory Coast       | 1192      | 15     | 1177      | 34        | 1133      | 26        | 24                    | 4.5       | 3.6       |
| Congo DR          | 2129      | 0      | 2129      | 9         | 304       | 1816      | 0                     | 3.1       | 5.8       |
| Equatorial Guinea | 88        | 0      | 88        | 88        | 0         | 0         | 0.4                   |           |           |
| Eritrea           | 40        | 0      | 40        | 40        | 0         | 0         |                       |           |           |
| Ethiopia          | 10        | 1      | 9         | 2         | 8         | 0         | 25                    | 21.9      |           |
| Gabon             | 220       | 0      | 220       | 2         | 218       | 0         | 47.4                  | 5.8       |           |
| Gambia            | 209       | 0      | 209       | 0         | 0         | 209       |                       |           | 5.1       |
| Ghana             | 250       | 1      | 249       | 174       | 2         | 154       | 22.8                  | 23.9      | 7.4       |
| Guinea            | 117       | 10     | 107       | 37        | 8         | 80        | 22.6                  | 0.7       | 14.1      |
| Guinea-Bissau     | 117       | 0      | 117       | 0         | 1         | 116       | 20                    | 2.6       |           |
| Kenya             | 442       | 28     | 414       | 229       | 194       | 12        | 27.1                  | 10.8      | 5.4       |
| Liberia           | 604       | 0      | 604       | 0         | 503       | 101       | 1.4                   | 27.8      |           |
| Madagascar        | 178       | 2      | 176       | 2         | 0         | 176       |                       |           | 33.2      |
| Malawi            | 802       | 3      | 799       | 46        | 362       | 550       | 25.9                  | 12.5      | 6         |
| Mali              | 334       | 9      | 325       | 225       | 24        | 84        | 37.7                  | 24.1      | 20.7      |
| Mauritania        | 92        | 3      | 89        | 21        | 1         | 70        | 27.1                  | 4         | 16.2      |
| Mozambique        | 315       | 150    | 165       | 6         | 158       | 150       | 53.8                  | 52.6      | 40.4      |
| Namibia           | 380       | 0      | 380       | 0         | 296       | 84        |                       | 5         | 9.5       |
| Niger             | 1333      | 235    | 1098      | 462       | 709       | 265       | 30.2                  | 13.1      | 10.4      |
| Nigeria           | 2676      | 63     | 2613      | 235       | 2348      | 82        | 17.7                  | 11.7      | 11.6      |
| Rwanda            | 140       | 0      | 140       | 140       | 0         | 0         |                       |           |           |
| Senegal           | 554       | 23     | 531       | 334       | 115       | 99        | 31.5                  | 10.4      | 10.7      |
| Sierra Leone      | 22        | 0      | 22        | 8         | 0         | 14        | 0                     |           | 1.5       |
| Somalia           | 28        | 4      | 24        | 0         | 25        | 0         |                       | 10.4      |           |
| South Africa      | 309       | 0      | 309       | 3         | 1         | 306       | 33                    | 26        | 2.1       |
| South Sudan       | 224       | 0      | 224       | 76        | 0         | 148       | 4.3                   |           | 0.7       |
| Sudan             | 126       | 2      | 124       | 99        | 58        | 2         | 13                    | 7.4       | 5         |
| Swaziland         | 253       | 1      | 252       | 5         | 0         | 247       | 6.3                   |           | 0.1       |
| Tanzania          | 662       | 64     | 598       | 196       | 61        | 368       | 28.3                  | 8.4       | 1.5       |
| Togo              | 2185      | 0      | 2185      | 1090      | 1         | 1094      | 20.2                  | 20.7      | 4.2       |
| Uganda            | 75        | 11     | 64        | 72        | 0         | 0         | 0.6                   |           |           |
| Zambia            | 672       | 7      | 665       | 103       | 555       | 14        | 23.9                  | 12.4      | 17.4      |
| Zimbabwe          | 416       | 10     | 406       | 287       | 1         | 0         | 24.3                  | 25.3      |           |
| Total             | 19485     | 687    | 18798     | 4500      | 7819      | 7726      | 21.85                 | 12.8      | 9.94      |

(a) *S. haematobium*

| Country           | Locations |        |           |           |           |           | Positive diagnose (%) |           |           |
|-------------------|-----------|--------|-----------|-----------|-----------|-----------|-----------------------|-----------|-----------|
|                   | Total     | School | Community | 2000-2010 | 2011-2014 | 2015-2019 | 2000-2010             | 2011-2014 | 2015-2019 |
| Angola            | 384       | 0      | 384       | 0         | 179       | 205       |                       | 8.6       | 0.4       |
| Benin             | 387       | 7      | 380       | 8         | 185       | 194       | 0                     | 2.8       | 1         |
| Botswana          | 125       | 0      | 125       | 1         | 0         | 124       | 0                     |           | 0.5       |
| Burkina Faso      | 202       | 0      | 202       | 102       | 21        | 95        | 3.6                   | 1.3       | 0.2       |
| Burundi           | 211       | 0      | 211       | 22        | 189       | 0         | 4.1                   | 1.9       |           |
| Cameroon          | 918       | 3      | 915       | 251       | 342       | 327       | 10.6                  | 6.2       | 2.4       |
| Central Africa    | 30        | 0      | 30        | 0         | 0         | 30        |                       |           | 52.6      |
| Chad              | 247       | 1      | 246       | 1         | 0         | 246       |                       |           | 1         |
| Ivory Coast       | 1536      | 19     | 1517      | 115       | 1396      | 26        | 31.7                  | 12.4      | 8.9       |
| Congo DR          | 2147      | 0      | 2147      | 9         | 314       | 1824      | 57.6                  | 3.8       | 6.6       |
| Equatorial Guinea | 88        | 0      | 88        | 88        | 0         | 0         | 0.2                   |           |           |
| Eritrea           | 335       | 0      | 335       | 40        | 151       | 146       | 2.4                   | 3.1       | 1         |
| Ethiopia          | 2326      | 19     | 2307      | 174       | 2133      | 13        | 18.6                  | 6.9       | 25.8      |
| Gabon             | 22        | 0      | 22        | 0         | 22        | 0         |                       | 0.1       |           |
| Gambia            | 209       | 0      | 209       | 0         | 0         | 209       |                       |           | 0.1       |
| Ghana             | 127       | 0      | 127       | 78        | 2         | 82        | 3.4                   | 27.9      | 3.7       |
| Guinea            | 117       | 10     | 107       | 37        | 8         | 80        | 66.2                  | 2.4       | 28        |
| Kenya             | 1812      | 159    | 1653      | 681       | 881       | 118       | 15.4                  | 24.7      | 15.8      |
| Liberia           | 1128      | 0      | 1128      | 0         | 1042      | 86        |                       | 11.6      | 19.3      |
| Madagascar        | 242       | 0      | 242       | 0         | 1         | 241       |                       | 15.2      | 17.1      |
| Malawi            | 754       | 3      | 751       | 30        | 328       | 537       | 0.5                   | 5         | 1.3       |
| Mali              | 324       | 6      | 318       | 216       | 24        | 84        | 7.2                   | 4.5       | 3         |
| Mauritania        | 66        | 4      | 62        | 11        | 0         | 55        | 4.7                   |           | 0         |
| Namibia           | 295       | 0      | 295       | 0         | 295       | 0         |                       | 4.1       |           |
| Niger             | 150       | 14     | 136       | 136       | 0         | 13        | 1.3                   |           |           |
| Nigeria           | 2347      | 21     | 2326      | 44        | 2227      | 75        | 9.6                   | 1.4       | 4.1       |
| Rwanda            | 326       | 0      | 326       | 142       | 183       | 1         | 3                     | 2         | 8.3       |
| Senegal           | 257       | 14     | 243       | 51        | 105       | 100       | 44.7                  | 0.5       | 0.6       |
| Sierra Leone      | 103       | 0      | 103       | 79        | 10        | 14        | 25                    | 4.3       | 11.9      |
| South Africa      | 298       | 0      | 298       | 1         | 0         | 297       | 16.6                  |           | 0.2       |
| South Sudan       | 425       | 0      | 425       | 206       | 0         | 219       | 9.2                   |           | 3.7       |
| Sudan             | 43        | 2      | 41        | 40        | 1         | 1         | 13.1                  | 22.5      | 11.6      |
| Swaziland         | 247       | 0      | 247       | 0         | 0         | 247       |                       |           | 0.3       |
| Tanzania          | 919       | 213    | 706       | 143       | 223       | 372       | 12.7                  | 42.5      | 9.8       |
| Togo              | 2190      | 0      | 2190      | 1090      | 1         | 1099      | 3.4                   | 16.1      | 0.8       |
| Uganda            | 1720      | 83     | 1637      | 606       | 292       | 803       | 20.7                  | 26.4      | 12.5      |
| Zambia            | 661       | 13     | 648       | 86        | 558       | 14        | 8.5                   | 12        | 5.9       |
| Zimbabwe          | 404       | 6      | 398       | 279       | 1         | 0         | 8.6                   | 0         |           |
| Total             | 24122     | 597    | 23525     | 4767      | 11114     | 8315      | 13.5                  | 13.02     | 6.11      |

(b) *S. mansoni*

Table A.2: Overview of survey data in SSA for *S. haematobium* (left) and *S. mansoni* (right) during 2000-2019. Prevalence estimated from the raw survey data i.e. total positives out of total screened by period and country.

## Bayesian modelling

### Stationary model

Let  $y_j$  be the number of *Schistosoma* positive cases out of the  $N_j$  examined individuals at location  $j = 1, 2, \dots, n$  and survey period  $t$ , where  $t$  is an indicator variable for the time period with 2000-2010 as the baseline and dummy variables for 2011-2014 and 2015-2019. We assume that  $y_j$  follows a Binomial distribution with prevalence  $p_j$  and use the logit link function to relate the disease prevalence with its predictors, that is:

$$\begin{aligned} y_j &\sim \text{Binomial}(p_j, N_j), \\ \text{logit}(p_j) &= \beta x_j + bt + \xi_j + e_j. \end{aligned} \tag{12}$$

The vector  $x_j$  contains the values of the predictors at location  $j$  and time  $t$ . The regression coefficients  $\beta$  and  $b$  represent the effects of the predictors and the global time trend, respectively. Non-spatial variation is captured through the pure noise term  $e_j$ . In order to take into account potential spatial correlation, we included in the model a random spatial term  $\xi_j$  at unique location  $j$  and assumed that  $\xi = (\xi_1, \xi_2, \dots, \xi_n)$  is a zero mean, and stationary Gaussian random process  $\xi \mid \sigma, \rho \sim N(0, \Sigma(\sigma, \rho))$  with a Matérn covariance function  $C_\nu(d_{ij}) = \sigma^2 \frac{2^{1-\nu}}{\Gamma(\nu)}$ , where  $\Gamma$  is the gamma function and  $\Sigma(\sigma, \rho)$  is the covariance matrix with elements  $c_{ij} = C_\nu(d_{ij})$ , and  $d_{ij}$  is the Euclidian distance between two locations  $i$  and  $j$ ,  $K_\nu(x)$  the modified Bessel function of order  $\nu$ , where  $\nu$  determines the smoothness of the process. As  $\nu$  increases, the function becomes more smooth, i.e.  $\nu = 0.5$  represents the exponential covariance function, and for  $\nu \rightarrow \infty$  it approximates the Gaussian covariance function. The hyperparameters  $\sigma$  and  $\rho$  define the spatial variance and range (i.e. distance where spatial correlation is considered non-essential), accordingly. In our analysis we fixed  $\nu = 1$  which leads to stable computations with INLA [33], while the spatial parameters  $\sigma$  and  $\rho$  are estimated in the process.

We assumed non-informative Gaussian prior distributions for the regression coefficients  $\beta$  and the global time trend  $b$ . Non-informative gamma prior distributions were considered for the hyper-parameters  $\sigma$ ,  $\rho$  of the spatial process and  $\sigma_e$  of the pure noise (transformed on the logarithmic scale), that is  $\log\left(\frac{1}{\sigma^2}\right) \sim Ga(5 \times 10^{-5}, 1)$ ,  $\log(\rho) \sim Ga(0.01, 1)$ , and  $\log\left(\frac{1}{\sigma_e^2}\right) \sim Ga(5 \times 10^{-5}, 1)$ .

### Restricted spatial model

In order to account for spatial confounding due to multicollinearity between the spatial covariates  $X = (x_j)$  and the spatial stochastic process  $\xi$ , we update the model in 2 by replacing the spatial process  $\xi$  with  $\xi = (I - P_x)\xi$ , where  $P_x = X$  is the projection matrix and  $(I - P_x)\xi$  is the orthogonal projection of the spatial process  $\xi$  on  $X$ .

### Non-stationary model

Let  $\xi = (\xi_1, \xi_2, \dots, \xi_n)$  be a non-stationary Gaussian stochastic process,  $\tau_j$  the local precision where  $j$  is a given location in space, and  $\kappa$  the spatial scale parameter associated empirically with the spatial range  $\rho \approx \frac{\sqrt{8}}{\kappa}$ , such that for  $\nu = 1$  the spatial correlation is 0.1 at  $\rho$  distance [33]. Then we specify  $\log(\kappa) = \theta_1$ ,  $\log(\tau_j) = \theta z_j$ , where vector  $z_j$  represents the values of the covariates for the spatial variance at location  $j$ . Now the spatial variance becomes  $\sigma = (\sigma_1^2, \sigma_2^2, \dots, \sigma_n^2)$ , where  $\sigma_j^2 \approx \frac{1}{4\pi\kappa^2\tau_j^2}$ ,  $j = 1, \dots, n$  [33]. We conclude the Bayesian specification by

assuming non-informative Gaussian prior distributions for the hyper parameters  $\theta_1$  and  $\theta$ .

### Spatio-temporal model

Let  $\phi = (\phi_{jt}), j = 1, 2, \dots, n, t = 1, 2, \dots, T$  be a stochastic process accounting for correlation in space and time, for  $n$  unique locations and  $T$  time-points [18]. The spatio-temporal process  $\phi_{jt}$  changes in time through a first order autoregressive process (AR1):

$$\phi_{jt} = \begin{cases} \xi_{j1}, & t = 1 \\ a\phi_{j,t-1} + \xi_{jt}, & t = 2, \dots, T \end{cases}$$

where  $a$  is the temporal lag with  $a \vee 1$  and  $\xi$  a pure spatially structured term with  $\xi = (\xi_{jt}), j = 1, 2, \dots, n, t = 1, 2, \dots, T$  which follows a zero-mean multivariate normal distribution as described in (1) with Matérn covariance function for  $j_1 = j_2$ :

$$\text{Cov}(\xi_{j_1, t_1}, \xi_{j_2, t_2}) = \begin{cases} \sigma^2 C_\nu(d_{j_1, j_2}), & t_1 = t_2 \\ 0, & t_1 \neq t_2 \end{cases}$$

### Model selection and validation

Due to the large number of potential predictors, each of them was examined for multicollinearity with the remaining, excluding those with variance inflation factor  $>4$ . Bayesian geostatistical models were fitted with one predictor at a time, to identify the predictors functional form to be included in the final geostatistical predictive model. A linear and categorical form was considered for each predictor (categories corresponding to the quantiles of the predictor) and the form with lowest log CPO score was chosen [20, 23]. We identified a subset of 13 potential socioeconomic and environmental predictors (Appendix, Table A.4, page 31), which gave rise to a sample space of 8,192 possible models for *S. haematobium* and *S. mansoni*, respectively. We fitted all possible models for both *Schistosoma* infections. The models with highest predictive ability, were used for inference and predictions. Model validation was carried out by assessing the model's predictive performance. The models were fitted on a training set, including 90% of our survey locations, and their predictions were validated on a test set of the remaining locations. The mean absolute error (MAE), which is the average of the absolute differences between observed and predicted values, the % of prevalence correctly estimated within a 95% BCI and the % of prevalence underestimation were used to assess the out-of-sample performance of the models. Smaller values of MAE indicate smaller prediction error, the model predicts exactly the true value if MAE is equal to zero [34].

| <i>S. haematobium</i> MAE | Within BCI % | Underestimation % | <i>S. mansoni</i> MAE | Within BCI % | Underestimation % |
|---------------------------|--------------|-------------------|-----------------------|--------------|-------------------|
| 0.076                     | 79.6         | 2.0               | 0.050                 | 86.0         | 1.9               |
| 0.080                     | 76.5         | 2.9               | 0.053                 | 87.1         | 1.3               |
| 0.074                     | 78.0         | 2.4               | 0.053                 | 85.2         | 2.2               |
| 0.080                     | 79.9         | 1.8               | 0.056                 | 85.3         | 2.4               |
| 0.084                     | 79.0         | 2.4               | 0.052                 | 86.3         | 2.1               |
| 0.082                     | 78.7         | 2.8               | 0.053                 | 85.3         | 1.9               |
| 0.079                     | 75.6         | 2.6               | 0.053                 | 86.0         | 1.7               |
| 0.078                     | 77.9         | 2.1               | 0.044                 | 85.6         | 1.7               |
| 0.084                     | 76.4         | 2.8               | 0.056                 | 87.0         | 2.0               |
| 0.078                     | 76.9         | 2.3               | 0.053                 | 83.6         | 2.3               |
| 0.084                     | 75.6         | 2.5               | 0.047                 | 85.7         | 1.7               |
| 0.078                     | 78.5         | 1.9               | 0.051                 | 85.4         | 1.7               |
| 0.084                     | 77.5         | 2.3               | 0.052                 | 84.9         | 2.1               |
| 0.076                     | 78.9         | 2.1               | 0.050                 | 85.1         | 2.2               |
| 0.076                     | 76.1         | 1.9               | 0.053                 | 85.4         | 1.9               |
| 0.082                     | 78.0         | 2.2               | 0.050                 | 86.5         | 1.7               |
| 0.080                     | 76.3         | 1.5               | 0.050                 | 85.9         | 1.6               |
| 0.081                     | 75.6         | 2.9               | 0.056                 | 82.7         | 2.3               |
| 0.080                     | 78.8         | 2.8               | 0.051                 | 85.6         | 2.1               |
| 0.081                     | 75.6         | 2.8               | 0.048                 | 86.3         | 1.5               |
| 0.080                     | 77.5         | 2.4               | 0.052                 | 85.5         | 1.9               |

Table A.3: Mean absolute error, percentage of prevalence inside 95% BCI and percentage of prevalence underestimation for *S. haematobium* and *S. mansoni*, from 20 repeated model validations leaving out 10% of data.



## Number of infected school-aged children and estimated treatment needs

The models in (1) with the best set of explanatory variables obtained from the model selection were used to predict *S. haematobium* and *S. mansoni* prevalence across SSA on a 5 x 5 km grid of roughly 10 million pixels. A sample of 200 from the posterior predictive distribution was utilised to estimate population-adjusted prevalence and treatment needs at country level, together with their uncertainty. The predicted prevalence surfaces were overlaid with a population grid obtained from WorldPop (<http://www.worldpop.org.uk/>, accessed May 2020) providing population estimates at 100 x 100 m in 2010 and converted to number of infected people at pixel level in the WorldPop spatial resolution. Estimates of the number of infected people were aggregated at country level and divided by the total country population to obtain population-adjusted prevalence estimates. We obtained population estimates for the year 2019, by applying population growth rates obtained from the United Nations population prospects (<https://population.un.org/wpp/>, accessed 2020) to the 2010 data and assuming a linear population growth. The number of treatment needs for school-aged children (5-14 years) was calculated by categorising pixels into low (prevalence <10%), moderate (prevalence 10-50%) and high risk (prevalence >50%) categories and aggregating treatments at country level according to the number of infected individuals in each risk category, following WHO treatment guidelines [21].

Analyses were carried out using integrated nested Laplace approximations (INLA) [35] and the stochastic partial differential equations method (SPDE), [33] which were implemented in R software version 3.3.3 and the INLA package. The number of infected children was calculated at 100x100 m spatial resolution available for the population data, to reduce misclassification of population counts at the borders. These calculations were performed in Google Earth Engine. [36]

| Variables                                     | <i>S. haematobium</i> | <i>S. mansoni</i> |
|-----------------------------------------------|-----------------------|-------------------|
| Annual mean temperature                       | -                     | -                 |
| Annual precipitation                          |                       | Selected          |
| Elevation                                     | Selected              | Selected          |
| Infant mortality rate (IMR)                   | Selected              | Selected          |
| Isothermality                                 |                       | Selected          |
| Land cover                                    |                       |                   |
| LST at day                                    | Selected              | -                 |
| LST at night                                  | Selected              | Selected          |
| Max temperature of warmest month              | -                     | -                 |
| Mean diurnal temperature range                | Selected              |                   |
| Mean temperature of coldest quarter           | -                     | -                 |
| Mean temperature of driest quarter            | Selected              | Selected          |
| Mean temperature of warmest quarter           | -                     | -                 |
| Mean temperature of wettest quarter           |                       | Selected          |
| Min temperature of coldest month              | -                     | -                 |
| NDVI                                          | Selected              | Selected          |
| Precipitation of coldest quarter              | -                     | -                 |
| Precipitation of driest month                 | -                     | -                 |
| Precipitation of driest quarter               | -                     | -                 |
| Precipitation of warmest quarter              | -                     | -                 |
| Precipitation of wettest month                | Selected              | -                 |
| Precipitation of wettest quarter              | -                     | -                 |
| Precipitation seasonality                     | -                     | -                 |
| Proportion of improved drinking water sources | Selected              | Selected          |
| Proportion of improved sanitation             | Selected              | Selected          |
| Proportion of open defecation                 | Selected              | Selected          |
| Temperature annual range                      | -                     | -                 |
| Temperature seasonality                       | -                     | -                 |
| Agro-ecological zone                          | Selected              | Selected          |
| Urban extents                                 | Selected              | Selected          |

Table A.4: Predictors identified as important by variable selection and included in the final geostatistical models of *S. haematobium* and *S. mansoni*.

| Country                  | 2006 | 2007 | 2008 | 2009 | 2010  | 2011  | 2012 | 2013 | 2014 | 2015 | 2016 | 2017 | 2018  |
|--------------------------|------|------|------|------|-------|-------|------|------|------|------|------|------|-------|
| Angola                   | 0.0  | 0.0  | 0.0  | 0.0  | 0.0   | 0.0   | 0.0  | 0.0  | 14.4 | 9.1  | 32.8 | 25.9 | 29.4  |
| Benin                    | 0.0  | 0.0  | 0.7  | 0.0  | 16.1  | 0.0   | 0.1  | 5.1  | 47.2 | 45.7 | 35.0 | 45   | 46.5  |
| Botswana                 | 0.0  | 0.0  | 0.0  | 0.0  | 0.0   | 0.0   | 0.0  | 0.0  | 0.0  | 0.0  | 0.0  | 0.0  | 0.0   |
| Burkina Faso             | 24.5 | 6.4  | 28.4 | 23.2 | 100.0 | 82.4  | 79.6 | 96.4 | 62.4 | 94.5 | 70.6 | 92.6 | 100.0 |
| Burundi                  | 0.0  | 0.0  | 0.0  | 0.0  | 63.4  | 43.6  | 43.6 | 0.0  | 46.0 | 24.8 | 30.9 | 62.6 | 94.7  |
| Cameroon                 | 1.1  | 3.8  | 0.0  | 5.3  | 11.1  | 17.2  | 21.7 | 10   | 56.8 | 56.8 | 43.7 | 63.3 | 19.4  |
| Central African Republic | 0.0  | 0.0  | 0.0  | 4.5  | 26.4  | 0.0   | 30.1 | 7.8  | 9.4  | 0.0  | 39.4 | 0.0  | 15.9  |
| Chad                     | 0.0  | 0.0  | 0.0  | 0.0  | 0.0   | 0.0   | 0.0  | 0.0  | 0.0  | 0.0  | 0.0  | 57.7 | 45.3  |
| Congo                    | 0.0  | 0.0  | 0.0  | 0.0  | 0.0   | 0.0   | 0.0  | 0.0  | 2.0  | 54.9 | 18.2 | 40.8 | 37.4  |
| Congo DR                 | 0.0  | 0.0  | 0.0  | 0.0  | 0.0   | 0.0   | 0.0  | 0.0  | 11.9 | 12   | 42.1 | 57.8 | 49.2  |
| Cote d'Ivoire            | 0.0  | 0.0  | 0.0  | 0.1  | 0.0   | 0.0   | 16.9 | 21.5 | 36.1 | 10.8 | 48.3 | 62.9 | 62.7  |
| Equatorial Guinea        | 0.0  | 0.0  | 0.0  | 0.0  | 0.0   | 0.0   | 0.0  | 0.0  | 0.0  | 0.0  | 0.0  | 0.0  | 0.0   |
| Eritrea                  | 0.0  | 0.0  | 0.0  | 0.0  | 0.0   | 0.0   | 0.0  | 0.0  | 17.7 | 15.3 | 59.7 | 61.2 | 67.9  |
| Eswatini                 | 0.0  | 13.2 | 11.4 | 6.4  | 0.0   | 0.0   | 0.0  | 0.0  | 0.0  | 0.0  | 51.6 | 0.0  | 0.0   |
| Ethiopia                 | 0.0  | 0.0  | 0.0  | 0.0  | 0.0   | 0.0   | 0.0  | 4.5  | 7.6  | 28.8 | 29.2 | 47.3 | 48.0  |
| Gabon                    | 0.0  | 0.0  | 0.0  | 0.0  | 0.0   | 0.0   | 0.0  | 0.0  | 0.0  | 0.0  | 36.7 | 0.0  | 90.7  |
| Gambia                   | 0.0  | 0.0  | 0.0  | 0.0  | 0.0   | 0.0   | 0.0  | 0.0  | 0.0  | 0.0  | 0.0  | 83.3 | 0.0   |
| Ghana                    | 0.0  | 0.0  | 2.6  | 1.3  | 27.4  | 21.4  | 29.8 | 0.0  | 19.7 | 26.5 | 37.9 | 21.4 | 0.0   |
| Guinea                   | 0.0  | 0.0  | 0.0  | 0.0  | 0.0   | 0.0   | 33.5 | 0.0  | 0.0  | 0.0  | 31.2 | 42.7 | 47.1  |
| Guinea-Bissau            | 0.0  | 0.0  | 0.0  | 0.0  | 0.0   | 0.0   | 0.0  | 0.0  | 0.0  | 38.5 | 0.0  | 0.0  | 97.9  |
| Kenya                    | 0.0  | 0.0  | 0.0  | 0.0  | 0.0   | 0.0   | 0.0  | 15.5 | 23.5 | 20.7 | 24.4 | 23.6 | 0.0   |
| Liberia                  | 0.0  | 0.0  | 0.0  | 0.0  | 0.0   | 0.0   | 30.9 | 29.0 | 0.0  | 0.0  | 12.8 | 15.5 | 79.2  |
| Madagascar               | 0.0  | 0.0  | 6.8  | 5.3  | 13.7  | 6.7   | 2.9  | 15.4 | 26.5 | 17.9 | 19.1 | 46.9 | 0.0   |
| Malawi                   | 0.0  | 0.0  | 0.1  | 6.1  | 26.4  | 31.5  | 43.1 | 0.0  | 56.9 | 80.1 | 64.5 | 44.5 | 79.2  |
| Mali                     | 11.1 | 4.8  | 25.1 | 15.0 | 73.5  | 42.9  | 42.0 | 70.4 | 9.2  | 65.7 | 58.8 | 56.0 | 54.9  |
| Mauritania               | 0.0  | 0.6  | 0.0  | 0.0  | 27.2  | 0.0   | 22.9 | 9.6  | 0.0  | 21.2 | 0.0  | 32.0 | 31.1  |
| Mozambique               | 0.0  | 2.9  | 0.0  | 0.0  | 3.8   | 13.6  | 9.8  | 28.1 | 42.9 | 0.0  | 43.3 | 18.4 | 22.7  |
| Namibia                  | 0.0  | 0.0  | 0.0  | 0.0  | 0.0   | 0.0   | 0.0  | 0.0  | 0.0  | 0.0  | 0.0  | 0.0  | 0.0   |
| Niger                    | 15.3 | 12.3 | 11.4 | 12.4 | 51.1  | 23.1  | 78.5 | 42.4 | 92.4 | 54.7 | 0.0  | 97.7 | 100.0 |
| Nigeria                  | 0.1  | 0.1  | 0.8  | 0.8  | 4.0   | 2.7   | 5.4  | 5.9  | 11.0 | 31.3 | 39.9 | 55.3 | 45.3  |
| Rwanda                   | 0.0  | 0.0  | 20.1 | 27.6 | 0.0   | 0.0   | 15.8 | 24.7 | 7.6  | 12.7 | 0.0  | 40.3 | 50.4  |
| Sao Tome and Principe    | 0.0  | 0.0  | 0.0  | 0.0  | 0.0   | 0.0   | 0.0  | 0.0  | 0.0  | 72.0 | 60.6 | 0.0  | 59.8  |
| Senegal                  | 0.1  | 0.0  | 0.0  | 3.3  | 14.2  | 0.0   | 29.0 | 42.3 | 51.2 | 55.7 | 19.3 | 49.5 | 32.1  |
| Sierra Leone             | 0.0  | 0.0  | 0.0  | 11.2 | 99    | 100.0 | 98.9 | 93.2 | 0.0  | 100  | 81.8 | 99.8 | 0.0   |
| Somalia                  | 0.0  | 0.1  | 0.3  | 0.3  | 1.7   | 2     | 0.0  | 0.0  | 0.0  | 0.0  | 0.0  | 35.6 | 99.2  |
| South Africa             | 0.0  | 0.0  | 0.0  | 0.0  | 0.0   | 0.0   | 0.0  | 0.0  | 0.0  | 0.0  | 0.0  | 0.0  | 0.0   |
| South Sudan              | 0.0  | 0.0  | 0.0  | 0.0  | 0.0   | 0.0   | 0.0  | 0.0  | 16.1 | 0.0  | 0.0  | 0.0  | 0.0   |
| Sudan                    | 6.0  | 4.4  | 2.0  | 3.0  | 0.1   | 30.8  | 1.1  | 24.8 | 4.1  | 38.1 | 37.9 | 32.4 | 72.5  |
| Tanzania                 | 0.0  | 7.8  | 0.0  | 0.6  | 16.0  | 13.8  | 30.9 | 27.6 | 27.3 | 36.3 | 42.2 | 43.3 | 40.2  |
| Togo                     | 0.0  | 0.0  | 0.0  | 0.0  | 44.8  | 78.2  | 93.4 | 94.8 | 54   | 76.1 | 38.7 | 60.2 | 100   |
| Uganda                   | 1.9  | 0.0  | 5.9  | 12.7 | 32.9  | 17.6  | 18.6 | 0.0  | 26   | 36.2 | 36.7 | 51.9 | 55.5  |
| Zambia                   | 3.6  | 0.0  | 0.0  | 0.0  | 3.0   | 0.0   | 0.0  | 0.0  | 0.0  | 19.8 | 20.2 | 29.8 | 13.8  |
| Zimbabwe                 | 0.0  | 0.0  | 0.0  | 0.0  | 0.0   | 0.0   | 33.0 | 48.9 | 48.9 | 63.6 | 51.5 | 64.5 | 0.0   |

Table A.5: Schistosomiasis PC national treatment coverage for each sub-Saharan African country.

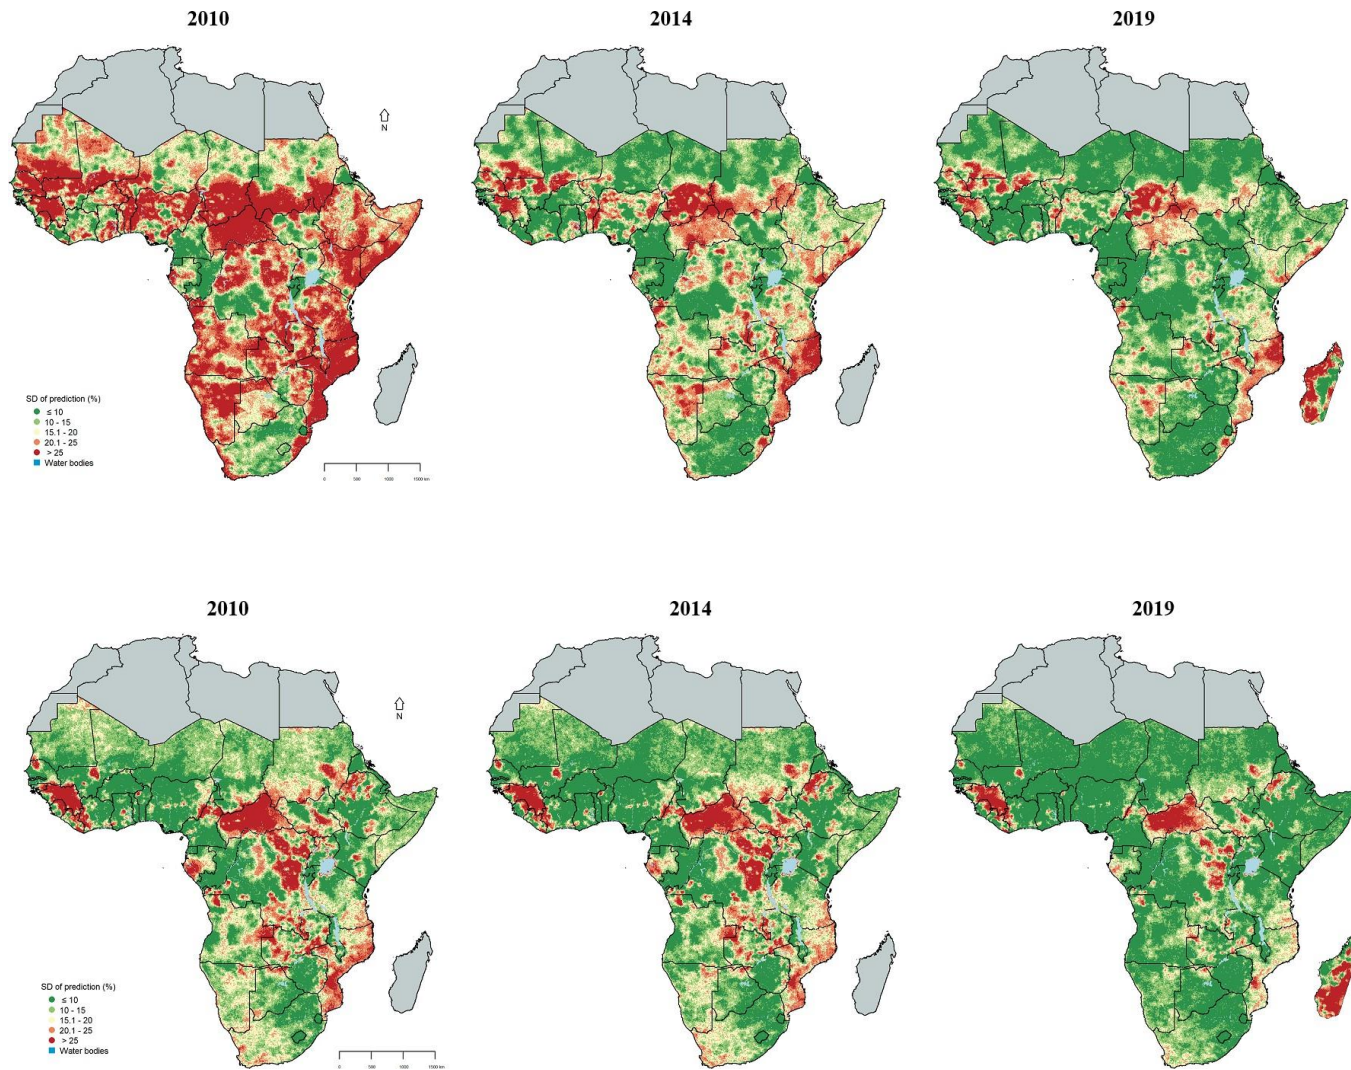

Figure A.2: Estimates of predictive uncertainty (posterior predictive standard deviation (SD)) for *S. haematobium* (top) and *S. mansoni* (bottom) across sub-Saharan Africa. Higher values of SD indicate larger prediction uncertainty for the prevalence at a given pixel. Practically, the prevalence at a given pixel varies between the predicted value plus or minus two units of SD.

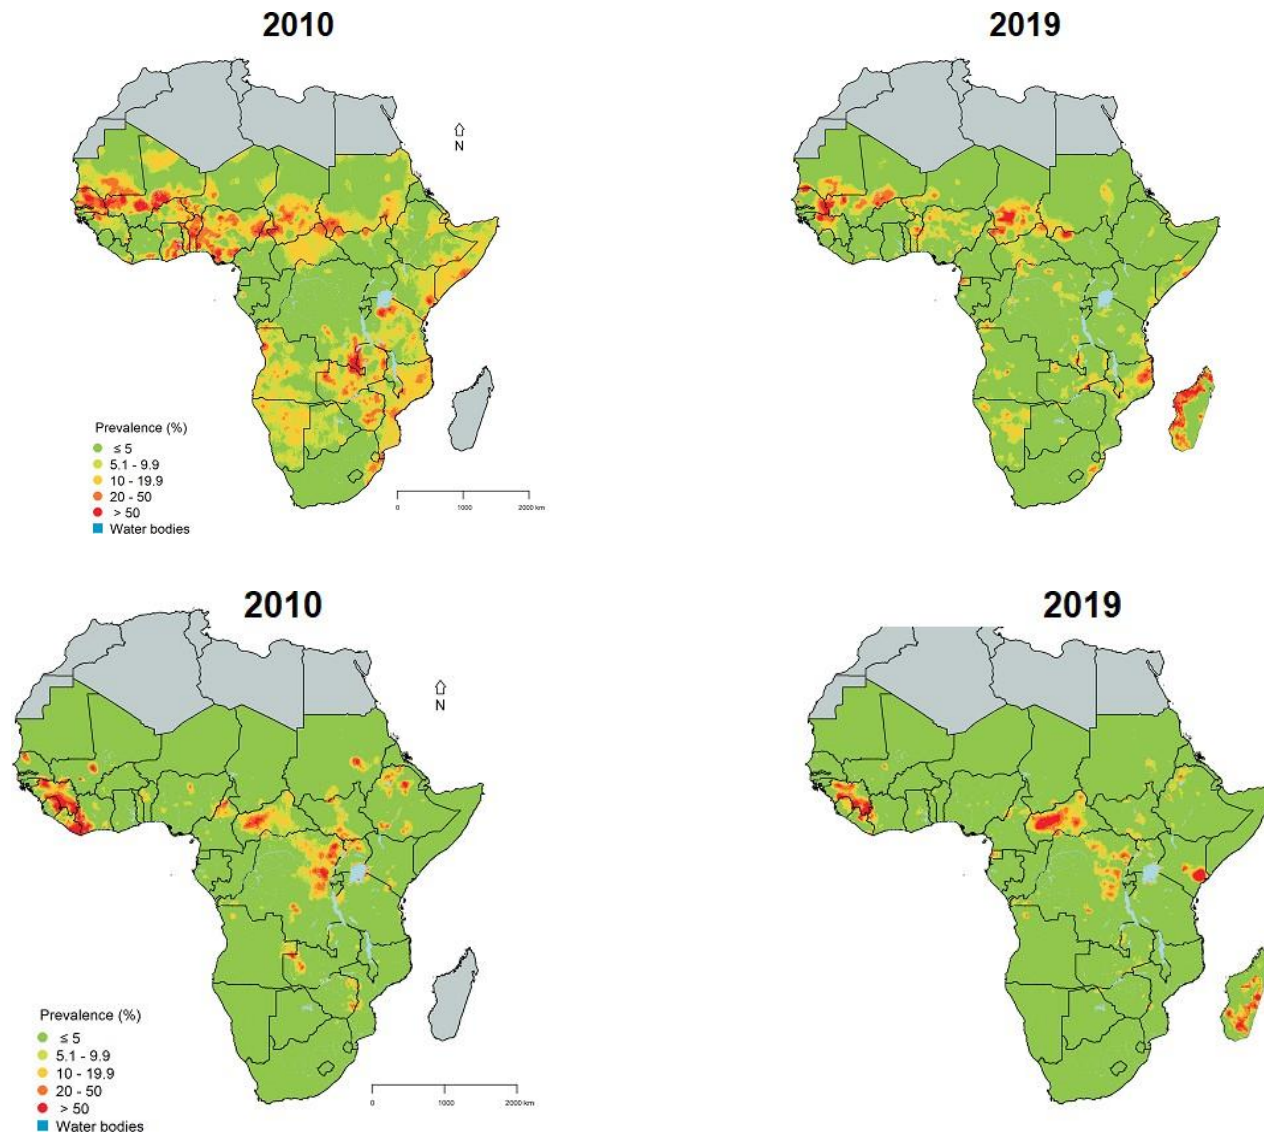

Figure A.3: Spatio-temporal model prevalence estimates (posterior predictive median) for *S. haematobium* (top) and *S. mansoni* (bottom) across sub-Saharan Africa.

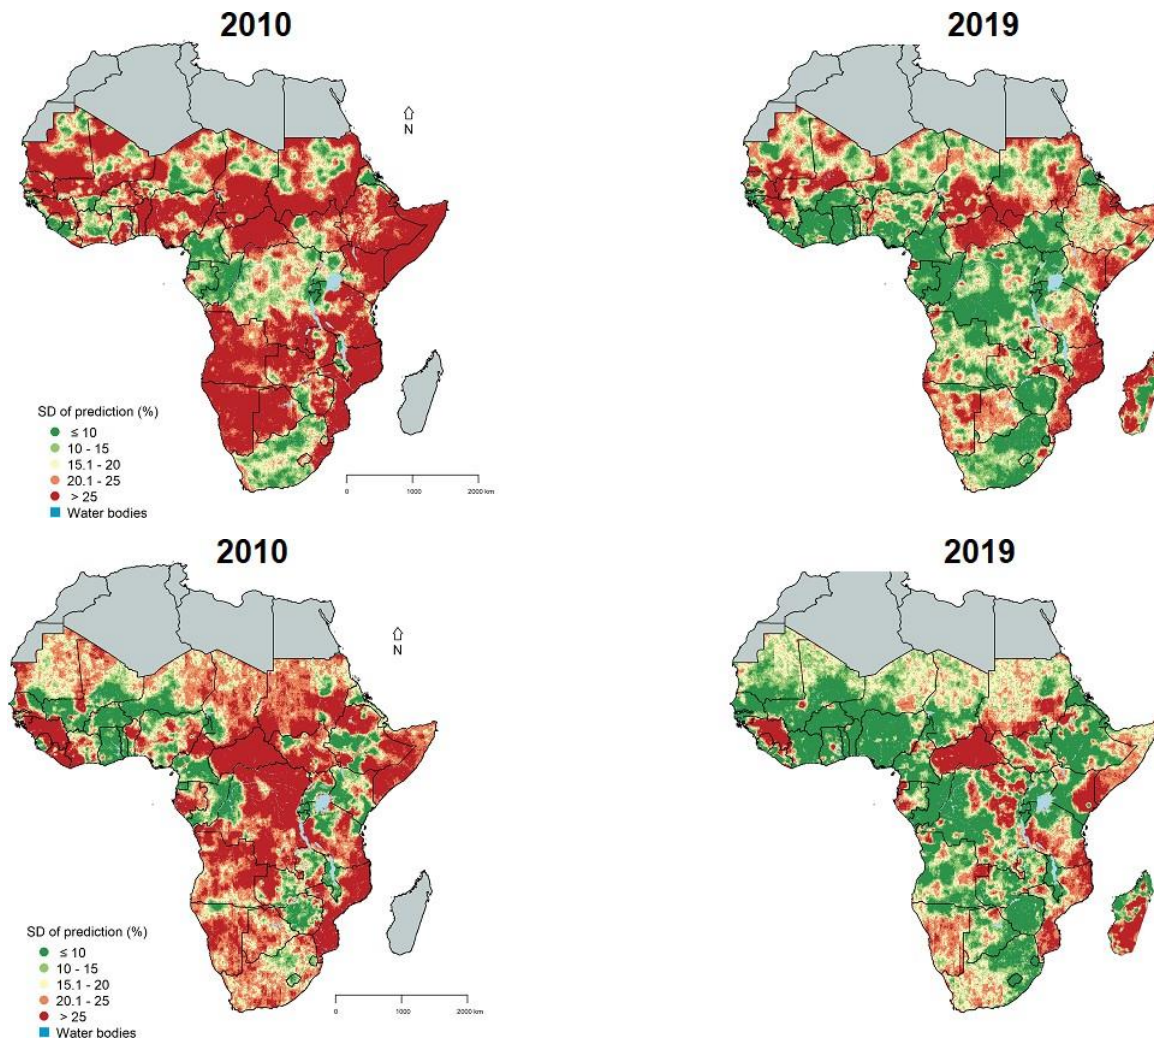

Figure A.4: Spatio-temporal model estimates of predictive uncertainty (posterior predictive standard deviation (SD)) for *S. haematobium* (top) and *S. mansoni* (bottom) across sub-Saharan Africa. Higher values of SD indicate larger prediction uncertainty for the prevalence at a given pixel. Practically, the prevalence at a given pixel varies between the predicted value plus or minus two units of SD.



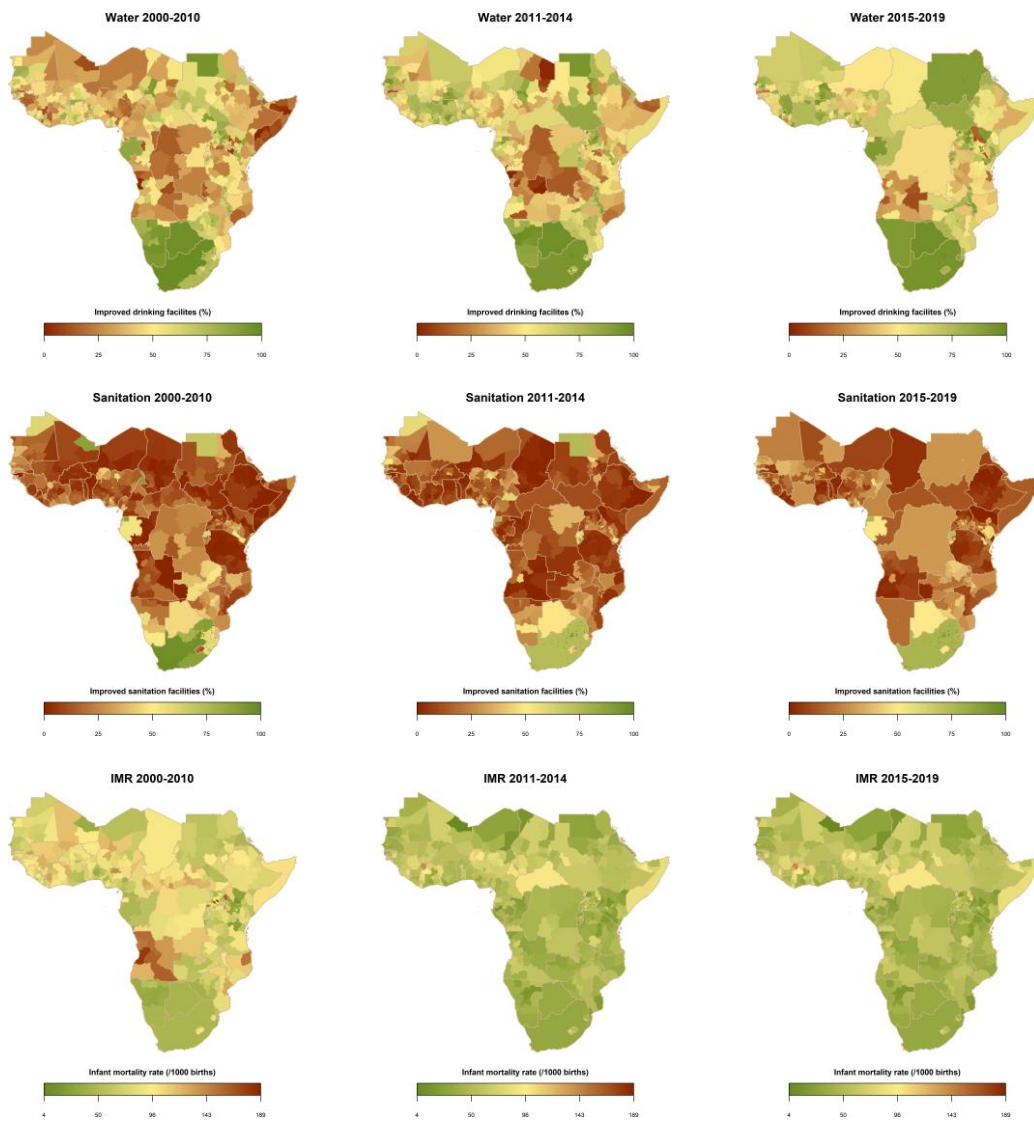

Figure A.5: Socioeconomic summaries across sub-Saharan Africa.

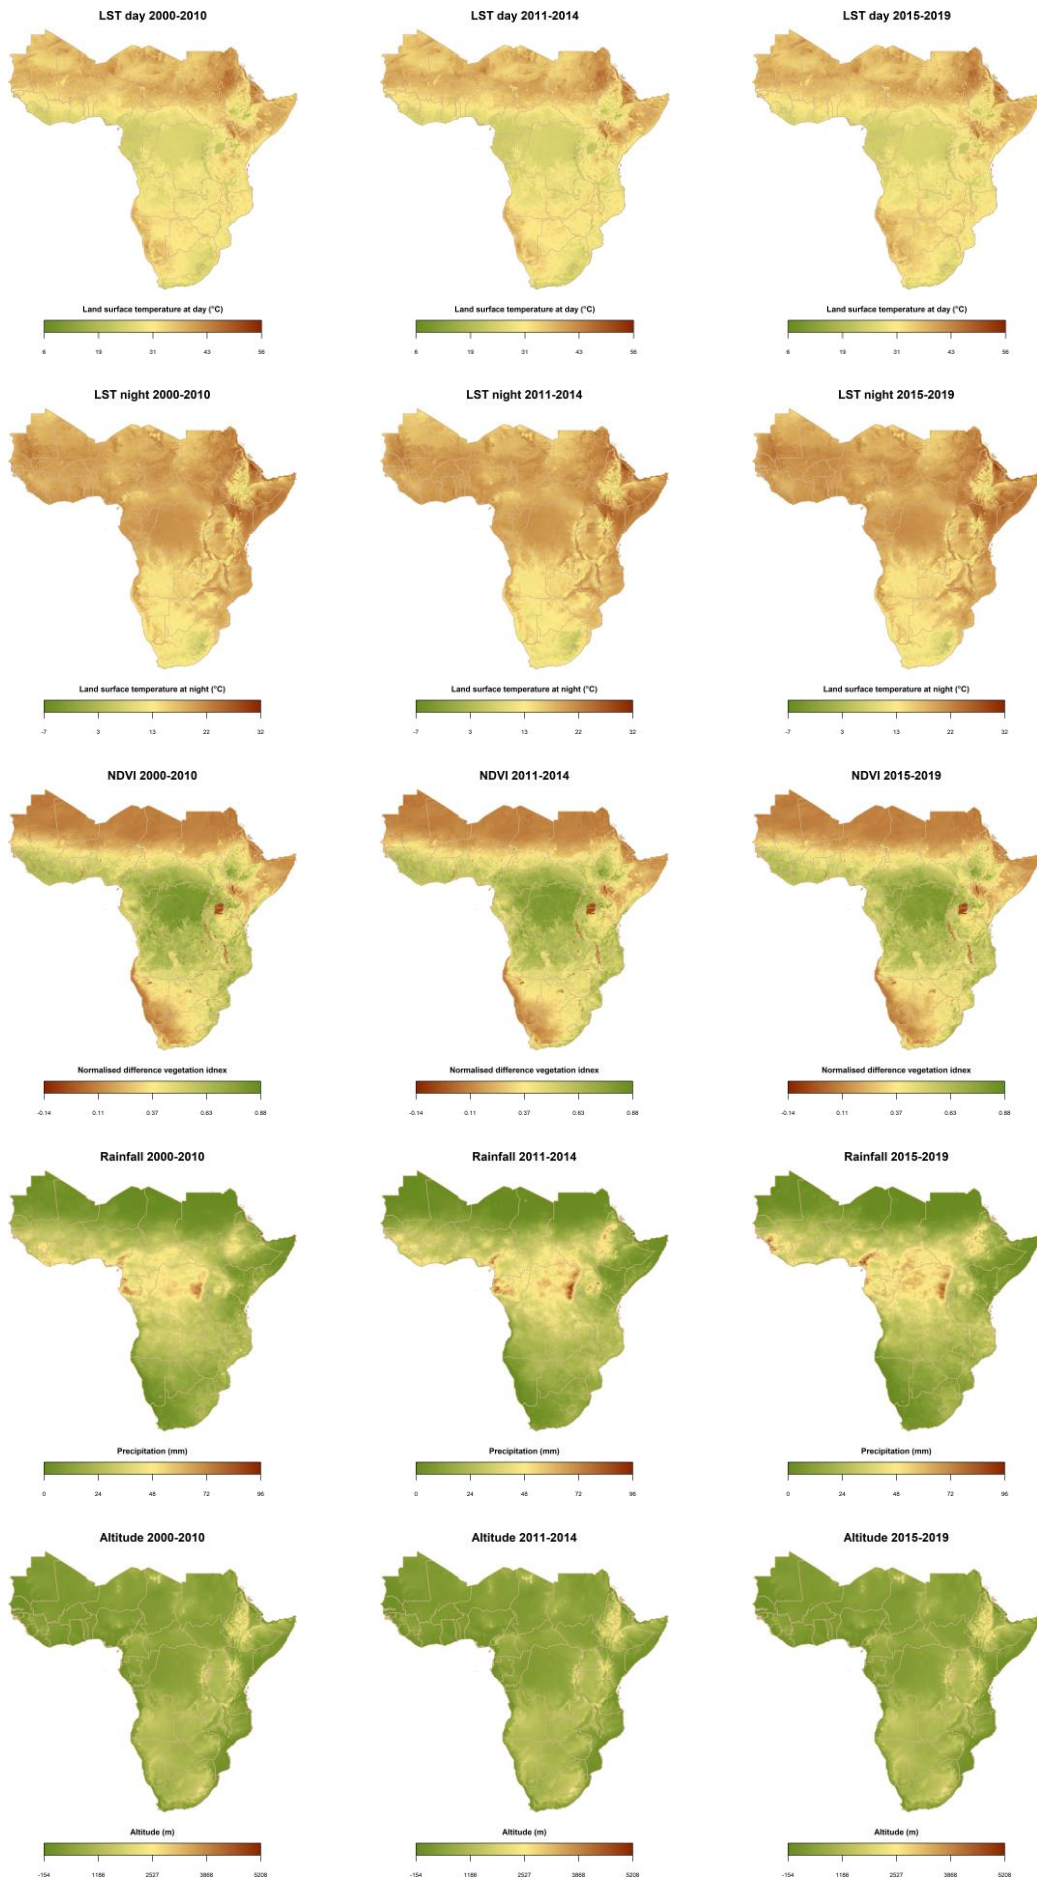



Figure A.6: Geographical distribution of environmental covariates across sub-Saharan Africa.

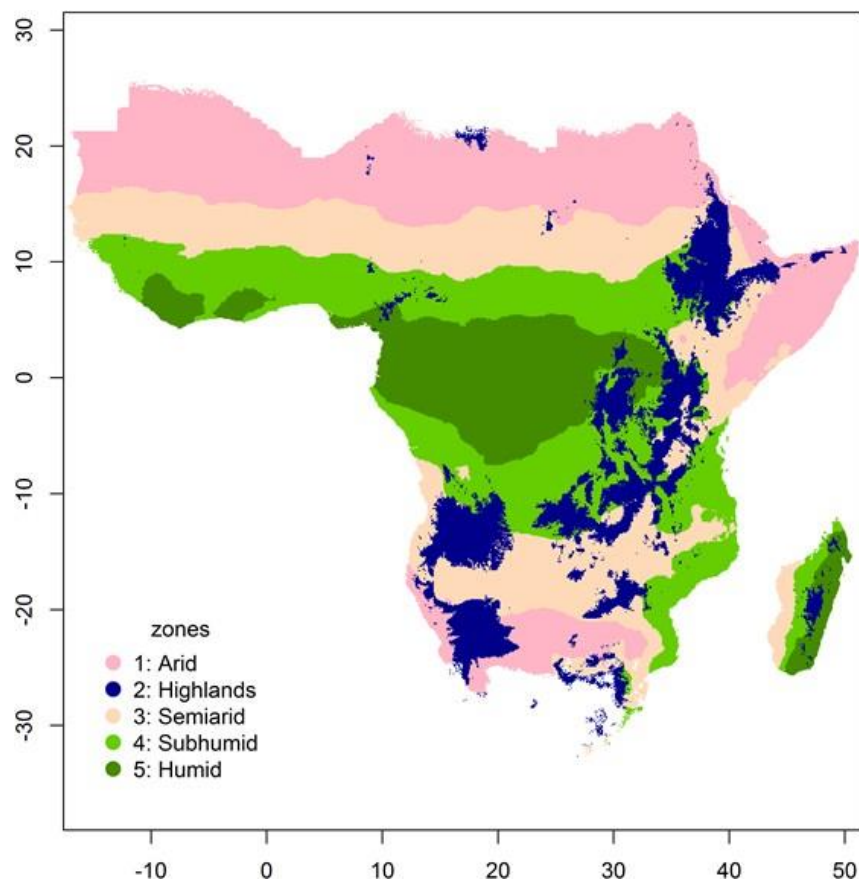

Figure A.7: Agro-ecological zones in sub-Saharan Africa.
